# Supplementary material for: Global elimination of leprosy by 2020: are we
Source: PubMed Central journal article supplement (PMC4618543; doi:10.1186/s13071-015-1143-4), 2015-10-22
Supplement: 13071_2015_1143_MOESM1_ESM.pdf [file 13071_2015_1143_MOESM1_ESM.pdf]

## Additional file 1: Supplementary tables and figures

David J. Blok<sup>1</sup>, Sake J. de Vlas<sup>1</sup>, Jan Hendrik Richardus<sup>1</sup>

<sup>1</sup>Department of Public Health, Erasmus MC, University Medical Center Rotterdam, The Netherlands

### Contents

|                                                                                                                                |   |
|--------------------------------------------------------------------------------------------------------------------------------|---|
| Table S1 – Overview of parameters to model household movements .....                                                           | 2 |
| Table S2 – Overview of parameters to model leprosy .....                                                                       | 3 |
| Figure S1 – Population size from 1820 to 2030.....                                                                             | 4 |
| Figure S2 – Simulated new case detection rate trends by leprosy classification (PB and MB).....                                | 5 |
| Figure S3 – Predicted annual number of new cases until 2030 assuming continuation of the present leprosy control strategy..... | 6 |
| Figure S4 – Simulated age distribution of new leprosy cases over time.....                                                     | 7 |
| Figure S5 – Simulated household size distribution of new leprosy cases over time.....                                          | 8 |
| References .....                                                                                                               | 9 |

**Table S1 – Overview of parameters to model household movements**

| <b>Parameters</b>                                                      | <b>Values</b>                                                                                                                                        | <b>Source</b>       |
|------------------------------------------------------------------------|------------------------------------------------------------------------------------------------------------------------------------------------------|---------------------|
| <b>Household movements</b>                                             |                                                                                                                                                      |                     |
| Fraction of non-married individuals moving randomly                    | India and Chattisgarh: <i>0.98 (only males)</i><br>Brazil and Para State: <i>0.75 (only males)</i><br>Indonesia and Madura: <i>1.0 (only males)</i>  | Calibrated          |
| Age range of random movements of non-married individuals               | India and Chattisgarh: <i>18-28yrs</i><br>Brazil and Para State: <i>12-22yrs</i><br>Indonesia and Madura: <i>12-22yrs</i>                            | Calibrated          |
| Household size to move to                                              | India and Chattisgarh: <i>Triangular(0,4,3)</i><br>Brazil and Para State: <i>Triangular(0,4,2)</i><br>Indonesia and Madura: <i>Triangular(0,4,2)</i> | Calibrated          |
| Rate at which households are split after adding a married couple       | All: <i>Exponential(12)</i>                                                                                                                          | Fischer et al. 2010 |
| Fraction of individuals moving to child after becoming a widow/widower | All: <i>1.0</i>                                                                                                                                      | Calibrated          |
| Fraction moving to partner after marriage                              | All: Males: <i>0.0</i> ; Females: <i>0.75</i>                                                                                                        | Fischer et al. 2010 |
| Fraction of moving person that create their own household              | India and Chattisgarh: <i>0.0</i><br>Brazil and Para State: <i>0.01</i><br>Indonesia and Madura: <i>0.0</i>                                          | Calibrated          |

**Table S2 – Overview of parameters to model leprosy**

| Parameters                             | Values                                                                                                                                                                                                                                                                                                                                                                                                                                                                      | Source                                                                 |
|----------------------------------------|-----------------------------------------------------------------------------------------------------------------------------------------------------------------------------------------------------------------------------------------------------------------------------------------------------------------------------------------------------------------------------------------------------------------------------------------------------------------------------|------------------------------------------------------------------------|
| <b>Natural History of infection</b>    |                                                                                                                                                                                                                                                                                                                                                                                                                                                                             |                                                                        |
| Susceptible                            | 20%; Allocation randomly determined                                                                                                                                                                                                                                                                                                                                                                                                                                         | Fischer et al. 2010                                                    |
| MB/PB proportion                       | India and Chattisgarh: <i>PB 52%; MB 48%</i><br>Brazil and Para State: <i>PB 34%; MB 66%</i><br>Indonesia and Madura: <i>PB17%; MB 83%</i>                                                                                                                                                                                                                                                                                                                                  | NLEP <sup>a</sup><br>SINAN <sup>b</sup><br>NLR <sup>c</sup>            |
| PB asymptomatic state                  | Mean duration: <i>4.2 yrs (SD: 1.9); Gamma distributed</i>                                                                                                                                                                                                                                                                                                                                                                                                                  | Fine, 1982; Meima et al. 2004                                          |
| PB recovered                           | Mean duration: <i>5 yrs; Exponentially distributed</i>                                                                                                                                                                                                                                                                                                                                                                                                                      | Fischer et al. 2010                                                    |
| MB asymptomatic                        | Mean duration: <i>11.1 yrs (SD: 5.0); Gamma distributed</i>                                                                                                                                                                                                                                                                                                                                                                                                                 | Fischer et al. 2010                                                    |
| <b>Treatment</b>                       |                                                                                                                                                                                                                                                                                                                                                                                                                                                                             |                                                                        |
| Treatment                              | Dapsone: 1970-1990<br>Dapsone relapse: $0.015\text{ y}^{-1}$<br>MDT: since 1990<br>MDT relapse: $0.001\text{ y}^{-1}$<br><br>Relapse to MB: 90%<br>Relapse to PB: 10%                                                                                                                                                                                                                                                                                                       | International Leprosy Association Technical Forum, 2002                |
| <b>Control</b>                         |                                                                                                                                                                                                                                                                                                                                                                                                                                                                             |                                                                        |
| Active case detection                  | India and Chattisgarh: <i>none</i><br>Brazil and Para State: <i>since 2003; coverage 0.59</i><br>Indonesia and Madura: <i>since 2009; coverage 0.12</i>                                                                                                                                                                                                                                                                                                                     | Lockwood et al. 2014<br>Ministry of Health, Brazil<br>NLR <sup>c</sup> |
| Passive case detection                 | India and Chattisgarh: <i>1970: 13yrs; 1980: 11yrs; 1990: 9yrs; 1997: 8.5yrs; 1998: 5.5yrs; 1999: 3yrs; 2001: 2yrs; 2005: 3yrs; 2012: 2.5yrs; After 2014: 2yrs</i><br>Brazil and Para State: <i>1970: 18yrs; 1990: 16yrs; 1996: 15yrs; 1997: 14yrs; 1998: 12yrs; 2001: 10.5yrs; 2002: 9yrs; 2003: 5.5yrs; 2008: 4.5yrs; After 2011: 3yrs</i><br>Indonesia and Madura: <i>1970: 10yrs; 1980: 8yrs; 1989: 5.5yrs; 1997: 5yrs; 1998:5.5yrs; 2004: 4.5yrs; After 2011: 2yrs</i> | Calibrated                                                             |
| BCG coverage in infants                | Protective effect of 60%                                                                                                                                                                                                                                                                                                                                                                                                                                                    | Schuring et al. 2009                                                   |
| <b>Transmission</b>                    |                                                                                                                                                                                                                                                                                                                                                                                                                                                                             |                                                                        |
| Contact rate in the general population | India: <i>0.970; 95% CI: 0.929-1.011</i><br>Chhattisgarh: <i>1.679; 95% CI: 1.638-1.720</i><br>Brazil: <i>0.367; 95% CI: 0.326-0.408</i><br>Pará State: <i>0.543; 95% CI: 0.503-0.584</i><br>Indonesia: <i>0.104; 95% CI: 0.063-0.145</i><br>Madura: <i>0.235; 95% CI: 0.194-0.276</i>                                                                                                                                                                                      | Calibrated                                                             |
| Contact rate within households         | 0.98                                                                                                                                                                                                                                                                                                                                                                                                                                                                        | Fischer et al. 2010                                                    |
| Infectivity                            | PB: <i>not infectious</i><br>MB: <i>Asymptomatic: 0-1 (linear increase); Symptomatic: 1 (constant)</i>                                                                                                                                                                                                                                                                                                                                                                      | Meima et al. 2004                                                      |

<sup>a</sup>National Leprosy Elimination Programme; <sup>b</sup>Sistema de Informações de Agravos de Notificação; <sup>c</sup>Netherlands Leprosy Relief foundation

**Figure S1 – Population size from 1820 to 2030.**

The solid line is the exponential growth curve used as input for the model.

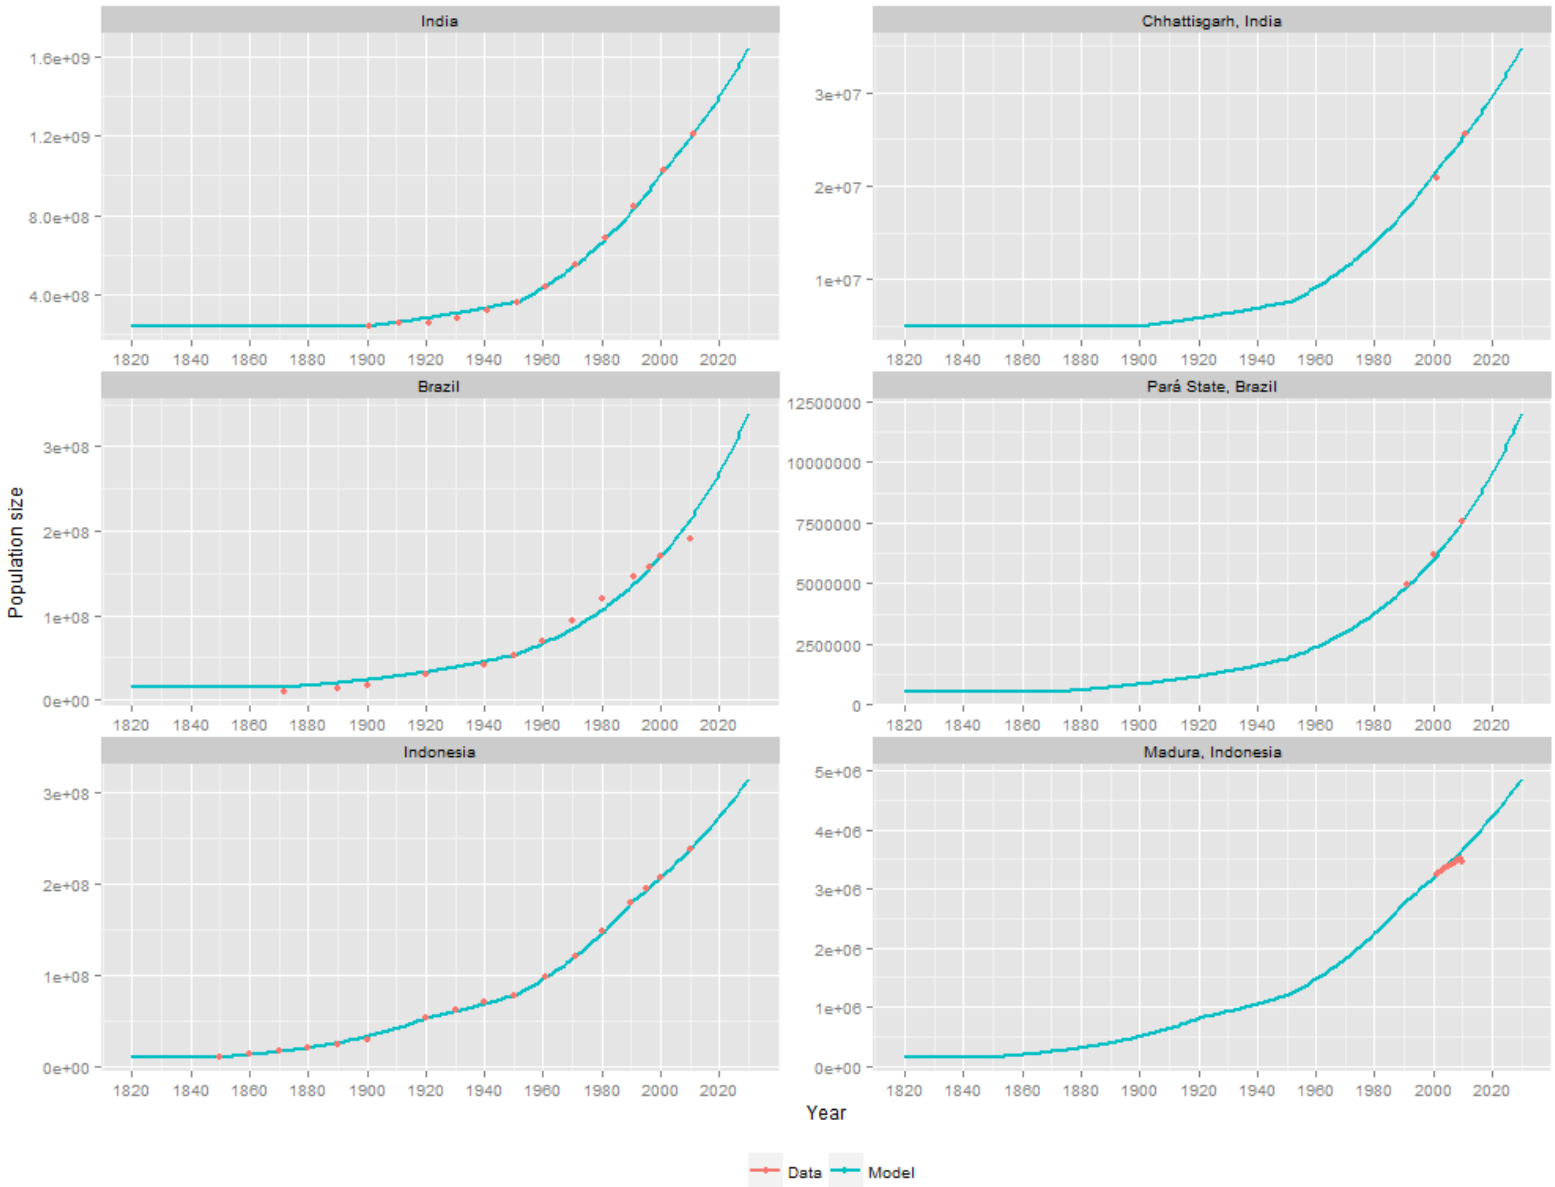

**Figure S2 – Simulated new case detection rate trends by leprosy classification (PB and MB).**  
 Simulated MB proportions matched the MB proportions from the data (India: 48%, Brazil: 66%,  
 Indonesia: 83%)

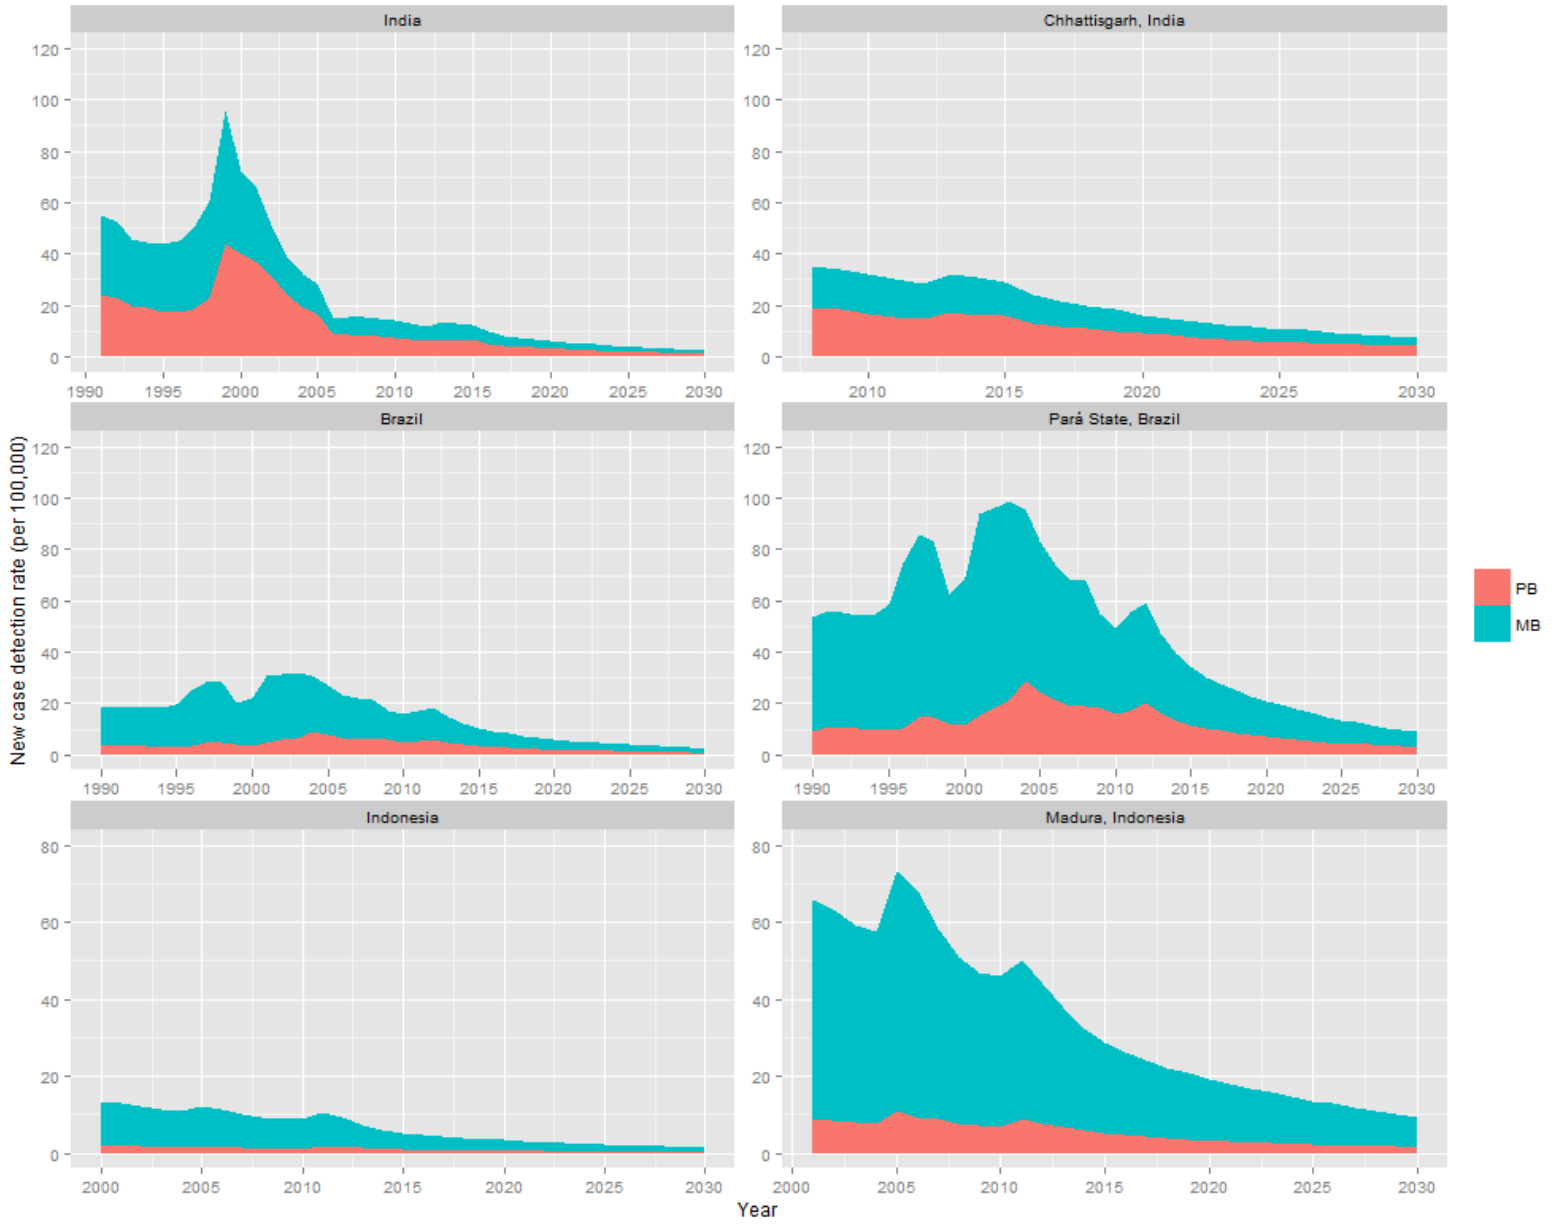

**Figure S3 – Predicted annual number of new cases until 2030 assuming continuation of the present leprosy control strategy.**

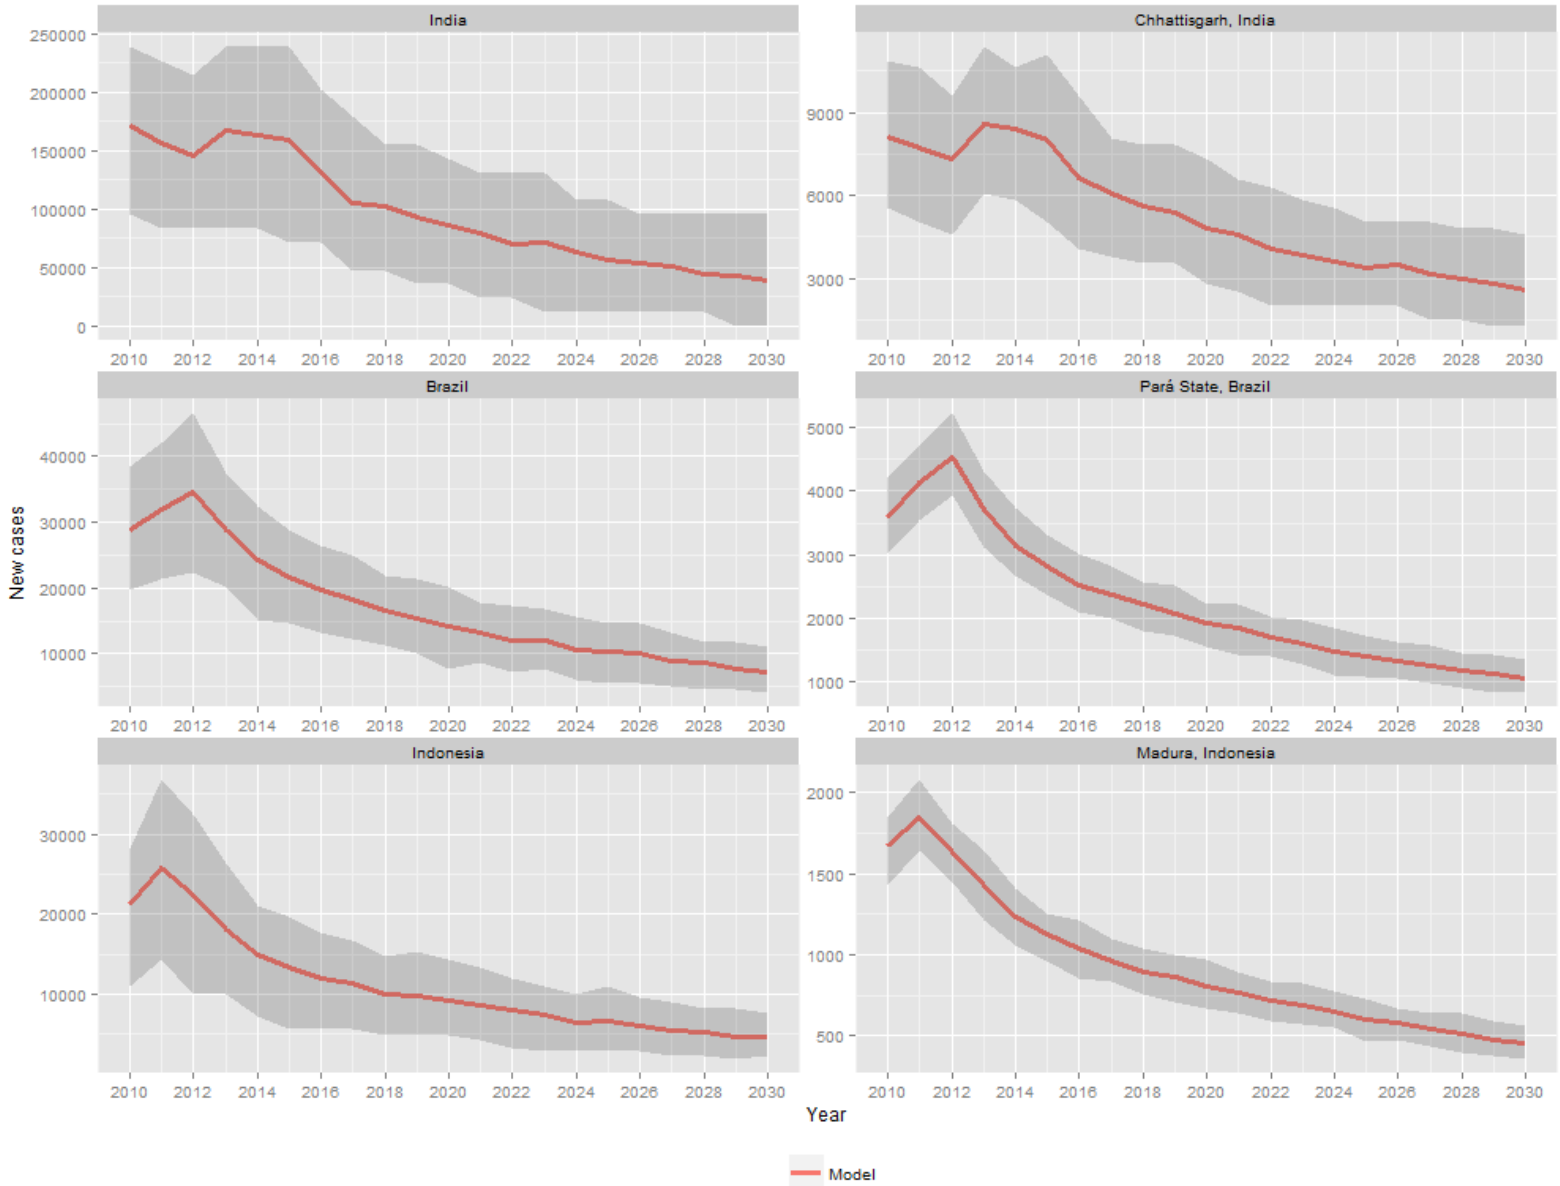

Figure S4 – Simulated age distribution of new leprosy cases over time.

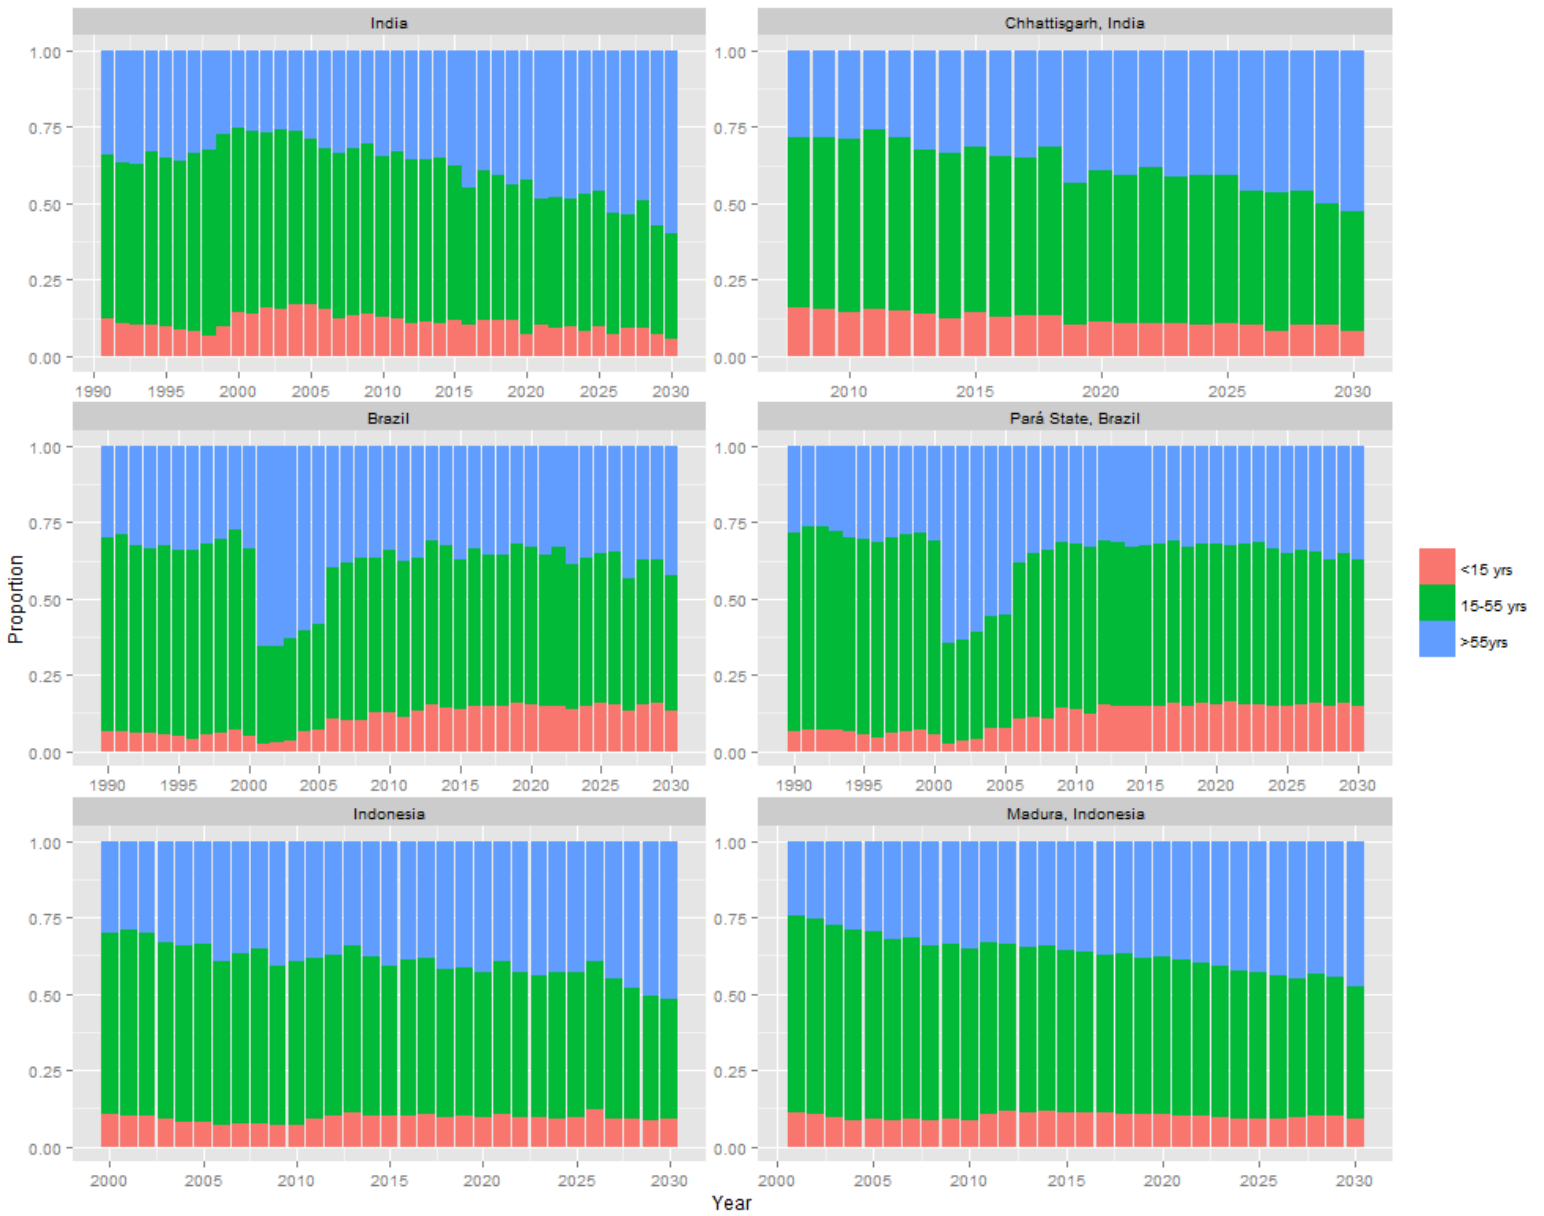

Figure S5 – Simulated household size distribution of new leprosy cases over time.

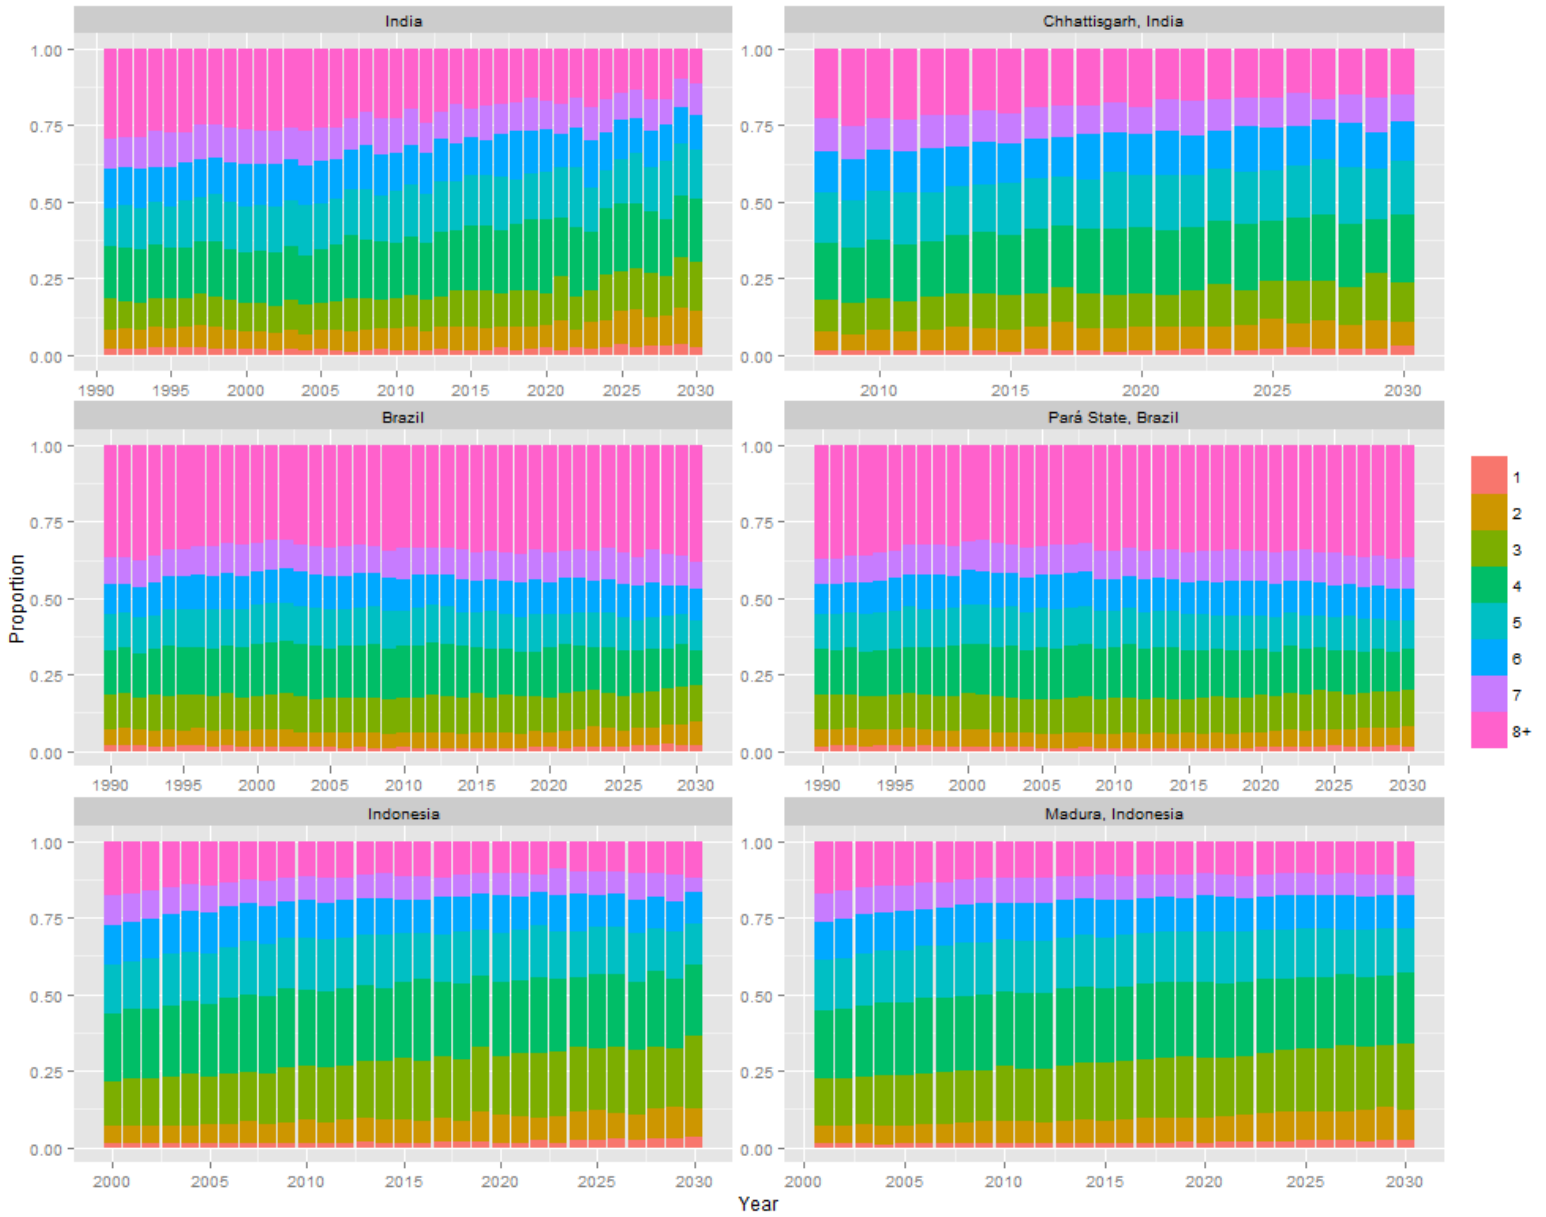



## References

1. Fischer, E.A.J., et al., Different mechanisms for heterogeneity in leprosy susceptibility can explain disease clustering within households. *PLoS One*, 2010. 5(11): p. e14061.
2. Fine, P.E., Leprosy: the epidemiology of a slow bacterium. *Epidemiological Review*, 1982. 4: p. 161-188.
3. Meima, A., et al., The future incidence of leprosy: a scenario analysis. *Bull World Health Organ*, 2004. 82(5): p. 373-80.
4. Anonymous, Report of the International Leprosy Association Technical Forum. *International Journal of Leprosy and other Mycobacterial diseases*, 2002. 70: p. S1-S62.
5. NLEP. National leprosy elimination programme. Available from: <http://nlep.nic.in/>.
6. SINAN. Sistema de Informações de Agravos de Notificação. Available from: <http://portalsaude.saude.gov.br/>.
7. Lockwood, D.N., V. Shetty, and G.O. Penna, Hazards of setting targets to eliminate disease: lessons from the leprosy elimination campaign. *BMJ*, 2014. 348: p. g1136.
8. Ministry of Health, National Hansen's Disease Control Programme Report 2009-2010. 2011, Ministry of Health.
9. Schuring, R.P., et al., Protective effect of the combination BCG vaccination and rifampicin prophylaxis in leprosy prevention. *Vaccine*, 2009. 27(50): p. 7125-8.
